# Supplementary material for: Concentration effects on the self-assembly of tyrosine molecules
Source: Royal Society of Chemistry journal article supplement (doi:10.1039/d1cp03031k), 2021-01-01
Supplement: d1cp03031k1.pdf [file d1cp03031k1.pdf]

## Electronic Supplementary Material (ESI) Concentration Effects on the Self-Assembly of Tyrosine Molecules

Hajar Nili Ahmadabadi,<sup>a</sup> Amir Ali Masoudi,<sup>b</sup> and Sahin Uyaver,<sup>c\*</sup>

<sup>a</sup> Department of Physics, Faculty of Physics and Chemistry, Alzahra University, Tehran, Iran.

<sup>b</sup> Department of Physics, Faculty of Physics and Chemistry, Alzahra University, Tehran, Iran.

<sup>c</sup> Department of Energy Science and Technologies, Turkish-German University, Sahinkaya Cad 106 34820 Beykoz, Istanbul, Turkey.

\*E-mail: uyaver@tau.edu.tr.

## Fitting Parameters of the Curves

Figure 1

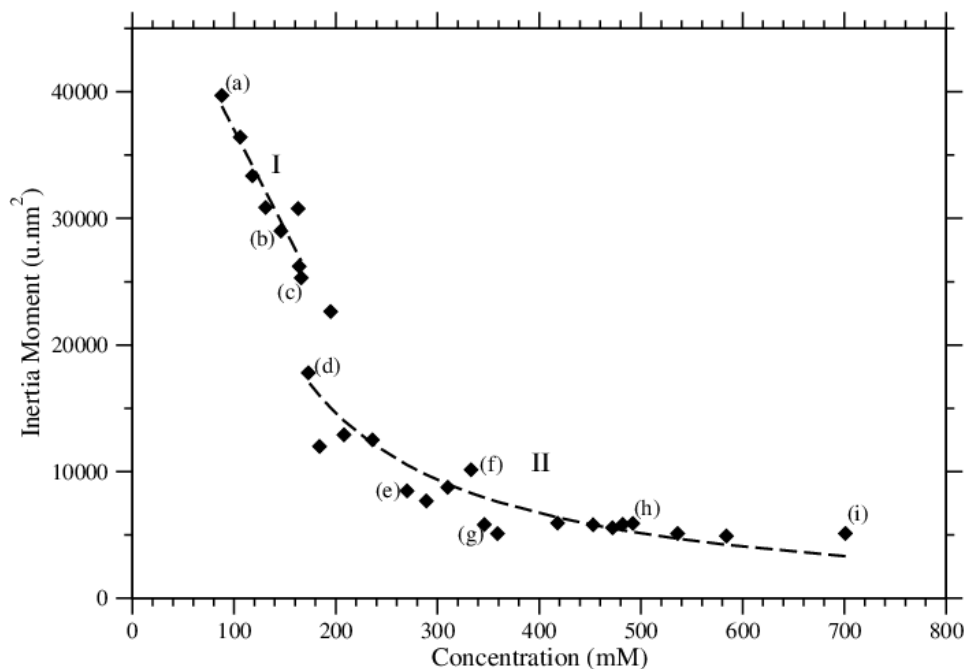

| Concentration range (mM) | Curve Type | Parameters                                                             |
|--------------------------|------------|------------------------------------------------------------------------|
| 88-166                   | $ax + b$   | $a = -156 \pm 23.1,$<br>$b = 52670 \pm 3200;$<br>$R^2 = 0.88446.$      |
| 173-701                  | $a/x + b$  | $a = 3166000 \pm 434000,$<br>$b = -1200 \pm 1500;$<br>$R^2 = 0.75746.$ |

Figure 2

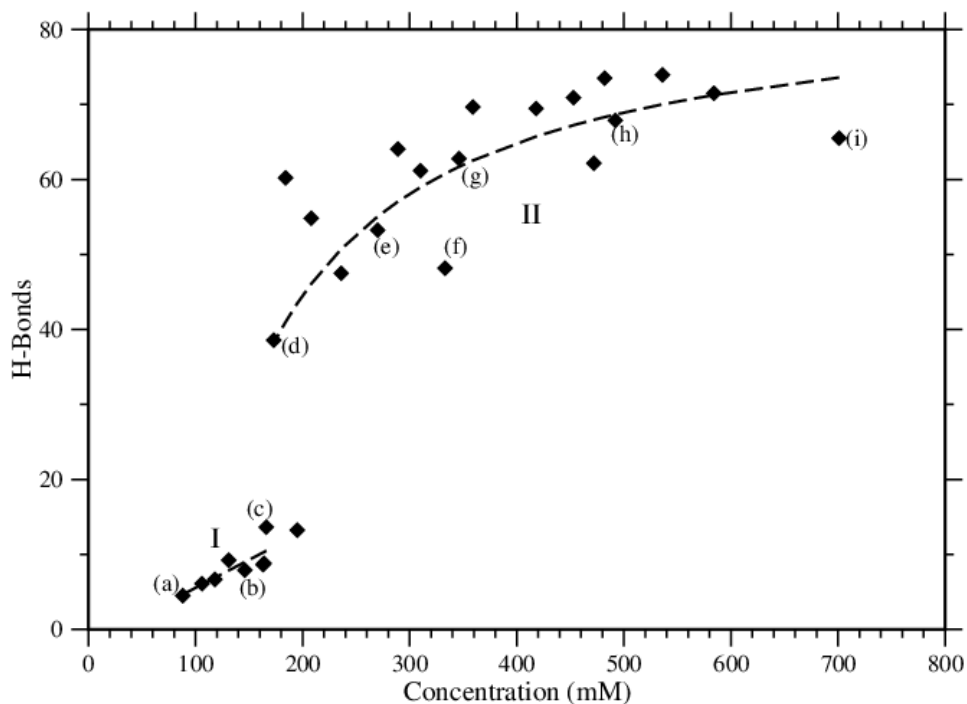

| Concentration range (mM) | Curve Type | Parameters                                                           |
|--------------------------|------------|----------------------------------------------------------------------|
| 88-166                   | $ax + b$   | $a = 0.0746 \pm 0.0222,$<br>$b = -1.92 \pm 3.1;$<br>$R^2 = 0.65375.$ |
| 173-701                  | $a/x + b$  | $a = -8140 \pm 1820,$<br>$b = 85.21 \pm 6.2;$<br>$R^2 = 0.541131.$   |

Figure 3

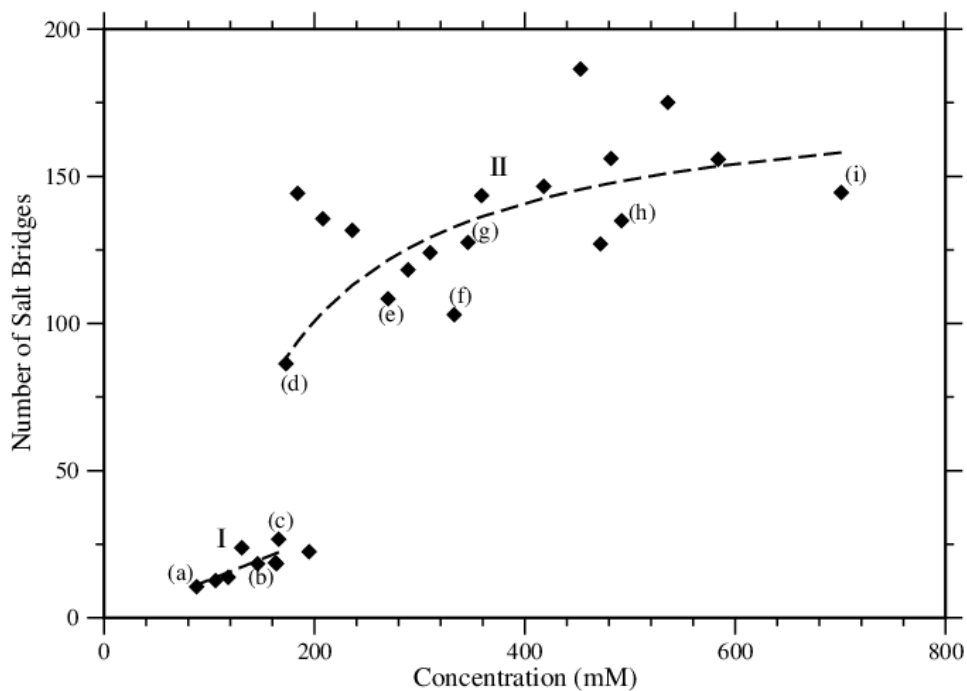

| Concentration range (mM) | Curve Type | Parameters                                                           |
|--------------------------|------------|----------------------------------------------------------------------|
| 88-166                   | $ax + b$   | $a = 0.1419 \pm 0.0498,$<br>$b = -1.33 \pm 6.9;$<br>$R^2 = 0.57523.$ |
| 173-701                  | $a/x + b$  | $a = -16040 \pm 5070,$<br>$b = 180.9 \pm 17;$<br>$R^2 = 0.37059.$    |

Figure 4

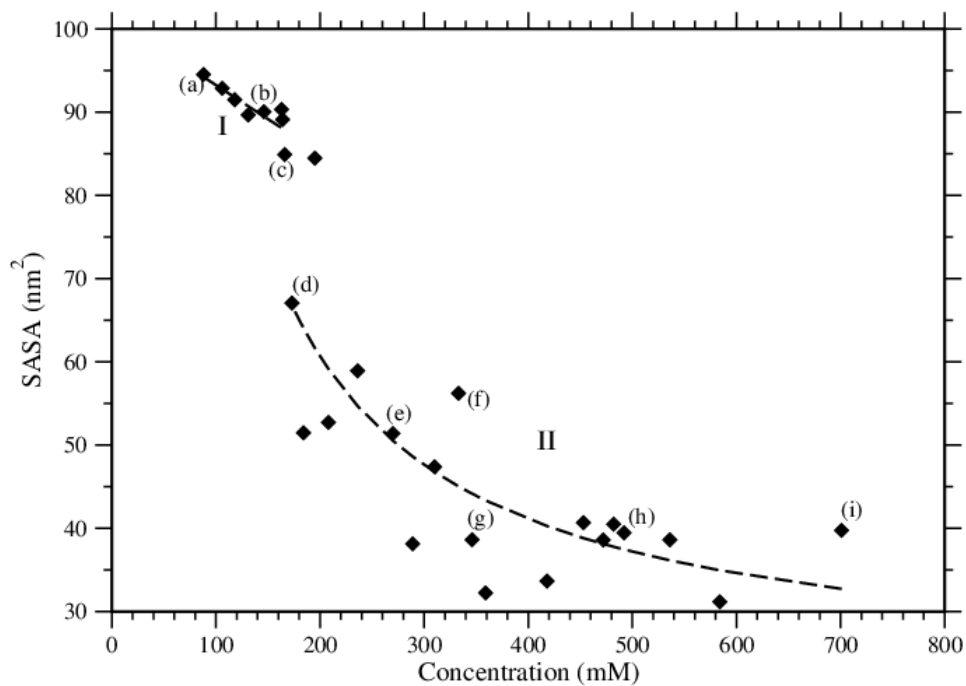

| Concentration range (mM) | Curve Type | Parameters                                                             |
|--------------------------|------------|------------------------------------------------------------------------|
| 88-166                   | $ax + b$   | $a = -0.0817 \pm 0.0213,$<br>$b = 101.42 \pm 2.9;$<br>$R^2 = 0.71079.$ |
| 173-701                  | $a/x + b$  | $a = 7820 \pm 1510,$<br>$b = 21.56 \pm 5.2;$<br>$R^2 = 0.61059.$       |
